# Supplementary material for: Personalized prediction of the secondary oocytes number after ovarian stimulation: A machine learning model based on clinical and genetic data
Source: PubMed Central journal article supplement (PMC10138216; doi:10.1371/journal.pcbi.1011020), 2023-04-27
Supplement: pcbi.1011020.s002.pdf [file pcbi.1011020.s002.pdf]

## S2 Appendix. Mathematical definitions, formulas and statistical hypotheses.

### Error metrics used to validate predictive model performance:

$$RMSE = \sqrt{\sum_{i=1}^n \frac{(\hat{y}_i - y_i)^2}{n}} \quad (1)$$

$$MAE = \frac{1}{n} \sum_{i=1}^n |\hat{y}_i - y_i| \quad (2)$$

$$MAPE = \frac{1}{n} \sum_{i=1}^n \frac{|\hat{y}_i - y_i|}{y_i} \times 100\% \quad (3)$$

where  $\hat{y}_i$  is the predicted number of MII oocytes for observation,  $y_i$  is the actual number of MII oocytes retrieved, and  $n$  is the population size.

### Quantization error (QE) metric used to validate SOM performance:

$$QE = \frac{1}{n} \sum_{i=1}^n d(x_i, m_{c_i}) \quad (4)$$

where  $n$  is the population size,  $d$  is the distance metric,  $x_i$  is the  $i$ -th observation and  $m_{c_i}$  is the BMU for the  $i$ -th observation.

**Statistical hypotheses:** Two separate groups were created for each variant: Group X with patients having the reference allele and Group Y with patients having the alternative allele of a sequence variant. Let  $F(u)$  and  $G(u)$  be the cumulative distribution functions of the distributions underlying Groups X and Y, respectively.

Testing for sequence variants that have a positive effect on the number of MII oocytes retrieved was performed as follows:

Mann–Whitney U hypothesis:

$$H_0 - F(u) = G(u)$$

$$H_1 - F(u) < G(u)$$

Kolmogorov–Smirnov hypothesis:

$$H_0 - F(u) \geq G(u)$$

$$H_1 - F(u) < G(u)$$

Testing for sequence variants having a negative effect on the number of MII oocytes was performed as follows:

Mann–Whitney U hypothesis:

$$H_0 - F(u) = G(u)$$

$$H_1 - F(u) > G(u)$$

Kolmogorov–Smirnov hypothesis:

$$H_0 - F(u) \leq G(u)$$

$$H_1 - F(u) > G(u)$$
