# Supplementary material for: Personalized prediction of the secondary oocytes number after ovarian stimulation: A machine learning model based on clinical and genetic data
Source: PubMed Central journal article supplement (PMC10138216; doi:10.1371/journal.pcbi.1011020), 2023-04-27
Supplement: pcbi.1011020.s003.pdf [file pcbi.1011020.s003.pdf]

**S1 Table.** Detailed clinical characteristics of women in Group 1. This study group consists of 5,779 patients and 8,574 IVF processes. Based on expert knowledge of the IVF domain, gynecologists selected a series of features that could affect the number of MII oocytes retrieved after ovarian stimulation. The features used to develop a clinical model are summarized. AMH—anti-Müllerian hormone, BMI—body mass index, E2—estradiol, IU—international unit, LH—luteinizing hormone, PCOS—polycystic ovary syndrome, PRG—progesterone.

| <b>Characteristic</b>                                                               | <b>Mean ± SD</b>       | <b>Range</b>                    |
|-------------------------------------------------------------------------------------|------------------------|---------------------------------|
| Age (years)                                                                         | 34.51 ± 4.54           | 18–46                           |
| Weight (kg)                                                                         | 65.19 ± 13.24          | 40–165                          |
| Height (cm)                                                                         | 166.80 ± 6.01          | 142–194                         |
| BMI (kg/m <sup>2</sup> )                                                            | 23.42 ± 4.62           | 14.70–64.48                     |
| AMH level (ng/mL) <sup>a)</sup>                                                     | 2.98 ± 2.42            | 0.02–14.88                      |
| E2 level (pg/mL)                                                                    | 18.62 ± 18.50          | 5.00–100.00                     |
| LH level (mIU/mL)                                                                   | 6.23 ± 4.63            | 0.10–19.90                      |
| PRG level (ng/mL)                                                                   | 0.32 ± 0.42            | 0.03–4.85                       |
| No. of follicles with sizes 2–8 mm                                                  | 14.56 ± 9.02           | 0–80                            |
| No. of follicles with sizes 3–8 mm                                                  | 7.79 ± 8.65            | 0–73                            |
| No. of follicles with sizes >11 mm                                                  | 0.14 ± 0.82            | 0–19                            |
| No. of follicles with sizes >14 mm                                                  | 0.11 ± 0.64            | 0–16                            |
| No. of follicles with sizes >18 mm                                                  | 0.06 ± 0.39            | 0–10                            |
| No. of follicles with sizes 16–22 mm                                                | 0.06 ± 0.46            | 0–16                            |
| No. of pick-ups in the last 4 months                                                | 0.23 ± 0.50            | 0–4                             |
| No. of cumulus-denuded oocytes in the previous pick-up                              | 8.26 ± 5.26            | 0–36                            |
| No. of MII oocytes in the previous pick-up                                          | 6.17 ± 4.10            | 0–32                            |
| No. of cumulus-denuded oocytes per cumulus in the previous pick-up                  | 0.66 ± 0.43            | 0–5.5                           |
| No. of MII oocytes per cumulus in the previous pick-up                              | 0.50 ± 0.36            | 0–4.33                          |
| Daily gonadotropin dose (IU) used in the previous process on Days 1–3 <sup>b)</sup> | 240.97 ± 67.26         | 75–1,275                        |
| Daily gonadotropin dose (IU) used in the previous process on Days 4–7               | 207.22 ± 56.00         | 75–375                          |
| <b>Characteristic</b>                                                               | <b>Number of women</b> | <b>Percentage of population</b> |
| Cause of infertility—idiopathic                                                     | 442                    | 5.16%                           |
| Cause of infertility—tubal                                                          | 602                    | 7.02%                           |
| Cause of infertility—PCOS                                                           | 406                    | 4.74%                           |
| Cause of infertility—male factor                                                    | 2,087                  | 24.34%                          |
| Cause of infertility—male genetic factor                                            | 292                    | 3.41%                           |
| Cause of infertility—female genetic factor                                          | 268                    | 3.13%                           |
| Cause of infertility—thyroid disorders                                              | 1,348                  | 15.72%                          |
| Cause of infertility—other endocrine disorders                                      | 448                    | 5.23%                           |
| Cause of infertility—immunologic disorders                                          | 347                    | 4.05%                           |

|                                                     |       |        |
|-----------------------------------------------------|-------|--------|
| Cause of infertility—recurrent implantation failure | 1,088 | 12.69% |
| Cause of infertility—low ovarian reserve            | 518   | 6.04%  |
| Cause of infertility—primary ovarian insufficiency  | 284   | 3.31%  |
| Cause of infertility—endometriosis                  | 557   | 6.50%  |

a) observations with the AMH level above 15ng/mL were removed from the database;

b) observations with the cumulative gonadotropin dose in Days 1–3 exceeding 1250 IU were removed from the database.
