# Supplementary material for: Personalized prediction of the secondary oocytes number after ovarian stimulation: A machine learning model based on clinical and genetic data
Source: PubMed Central journal article supplement (PMC10138216; doi:10.1371/journal.pcbi.1011020), 2023-04-27
Supplement: pcbi.1011020.s004.pdf [file pcbi.1011020.s004.pdf]

**S2 Table.** Characteristics of the 14 genes analyzed in this study, along with the number of sequence variants detected by genotyping. Biological process: GO:0048608—reproductive structure development, GO:0009755—hormone-mediated signaling pathway, GO:0022602—ovulation cycle process. Molecular function: GO:0005102—signaling receptor binding, GO:0030545—signaling receptor regulator activity.

| Gene symbol <sup>a)</sup> | Gene name <sup>b)</sup>                         | GO term                                                 | Chromosomal location <sup>a)</sup> | Reference sequence and location <sup>b)</sup>         | Variants detected <sup>c)</sup> |
|---------------------------|-------------------------------------------------|---------------------------------------------------------|------------------------------------|-------------------------------------------------------|---------------------------------|
| <i>AMH</i>                | anti-Mullerian hormone                          | GO:0048608,<br>GO:0022602,<br>GO:0005102,<br>GO:0030545 | 19p13.3                            | NC_000019.10<br>(2249323..2252073)                    | 26                              |
| <i>AMHR2</i>              | anti-Mullerian hormone receptor type 2          | GO:0048608                                              | 12q13.13                           | NC_000012.12<br>(53423855..53431672)                  | 17                              |
| <i>AR</i>                 | androgen receptor                               | GO:0048608,<br>GO:0009755,<br>GO:0005102                | Xq12                               | NC_000023.11<br>(67544021..67730619)                  | 53                              |
| <i>BMP15</i>              | bone morphogenetic protein 15                   | GO:0048608,<br>GO:0005102,<br>GO:0030545                | Xp11.22                            | NC_000023.11<br>(50910735..50916641)                  | 15                              |
| <i>ESR1</i>               | estrogen receptor 1                             | GO:0048608,<br>GO:0009755,<br>GO:0022602                | 6q25.1-q25.2                       | NC_000006.12<br>(151656672..152129619)                | 80                              |
| <i>ESR2</i>               | estrogen receptor 2                             | GO:0009755,<br>GO:0005102,<br>GO:0030545                | 14q23.2-q23.3                      | NC_000014.9<br>(64226707..64338613,<br>complement)    | 75                              |
| <i>FSHB</i>               | follicle-stimulating hormone subunit beta       | GO:0048608,<br>GO:0022602,<br>GO:0005102,<br>GO:0030545 | 11p14.1                            | NC_000011.10<br>(30231014..30235194)                  | 19                              |
| <i>FSHR</i>               | follicle-stimulating hormone receptor           | GO:0048608,<br>GO:0009755,<br>GO:0022602                | 2p16.3                             | NC_000002.12<br>(48962157..49154515,<br>complement)   | 34                              |
| <i>GDF9</i>               | growth differentiation factor 9                 | GO:0005102,<br>GO:0030545                               | 5q31.1                             | NC_000005.10<br>(132861185..132866651,<br>complement) | 33                              |
| <i>LHB</i>                | luteinizing hormone subunit beta                | GO:0048608,<br>GO:0009755,<br>GO:0005102,<br>GO:0030545 | 19q13.33                           | NC_000019.10<br>(49015980..49019498,<br>complement)   | 22                              |
| <i>LHCGR</i>              | luteinizing hormone/choriogonadotropin receptor | GO:0048608,<br>GO:0009755,<br>GO:0022602                | 2p16.3                             | NC_000002.12<br>(48686774..48755724,<br>complement)   | 44                              |
| <i>PRL</i>                | prolactin                                       | GO:0005102,<br>GO:0030545                               | 6p22.3                             | NC_000006.12<br>(22287246..22302835,<br>complement)   | 14                              |

|             |                                      |                                          |        |                                                       |     |
|-------------|--------------------------------------|------------------------------------------|--------|-------------------------------------------------------|-----|
| <i>PRLR</i> | prolactin receptor                   | GO:0048608,<br>GO:0009755,<br>GO:0005102 | 5p13.2 | NC_000005.10<br>(35048756..35230487,<br>complement)   | 103 |
| <i>SOX3</i> | SRY-box<br>transcription factor<br>3 |                                          | Xq27.1 | NC_000023.11<br>(140502985..140505069,<br>complement) | 9   |

<sup>a)</sup> according to the HUGO Gene Nomenclature Committee (HGNC) database ([www.genenames.org](http://www.genenames.org), accessed: 2022-04-05).

<sup>b)</sup> according to the National Center for Biotechnology Information (NCBI) Gene database; based on GRCh38 human genome assembly (<https://www.ncbi.nlm.nih.gov/gene/>, accessed: 2022-04-05).

<sup>c)</sup> details of identified sequence variants are presented in S3 Table.
