# Supplementary material for: Personalized prediction of the secondary oocytes number after ovarian stimulation: A machine learning model based on clinical and genetic data
Source: PubMed Central journal article supplement (PMC10138216; doi:10.1371/journal.pcbi.1011020), 2023-04-27
Supplement: pcbi.1011020.s006.pdf [file pcbi.1011020.s006.pdf]

**S4 Table.** Sequence variants with a positive effect on the number of MII oocytes identified by statistical tests.

| <b>Gene</b>  | <b>Variant</b> | <b>Reference allele</b> | <b>Alternative allele</b> | <b>Mann–Whitney U statistic</b> | <b><i>p</i>-value</b> | <b>Kolmogorov–Smirnov statistic</b> | <b><i>p</i>-value</b> |
|--------------|----------------|-------------------------|---------------------------|---------------------------------|-----------------------|-------------------------------------|-----------------------|
| <i>AR</i>    | rs189146053    | C                       | A                         | 8,940.50                        | 0.00                  | 0.46                                | 0.00                  |
| <i>LHCGR</i> | rs11887058     | C                       | T                         | 72,783.50                       | 0.00                  | 0.12                                | 0.01                  |
| <i>LHCGR</i> | rs10176989     | C                       | A                         | 42,881.50                       | 0.00                  | 0.14                                | 0.01                  |
| <i>PRLR</i>  | rs9292578      | C                       | A                         | 9,066.00                        | 0.00                  | 0.29                                | 0.03                  |
| <i>PRLR</i>  | rs115037164    | C                       | A                         | 9,604.50                        | 0.01                  | 0.29                                | 0.03                  |
| <i>PRLR</i>  | rs9292579      | G                       | A                         | 9,604.50                        | 0.01                  | 0.29                                | 0.03                  |
| <i>PRLR</i>  | rs142165087    | G                       | C                         | 9,604.50                        | 0.01                  | 0.29                                | 0.03                  |
| <i>PRLR</i>  | rs28365902     | G                       | A                         | 14,720.50                       | 0.01                  | 0.23                                | 0.02                  |
