# Supplementary material for: Personalized prediction of the secondary oocytes number after ovarian stimulation: A machine learning model based on clinical and genetic data
Source: PubMed Central journal article supplement (PMC10138216; doi:10.1371/journal.pcbi.1011020), 2023-04-27
Supplement: pcbi.1011020.s007.pdf [file pcbi.1011020.s007.pdf]

**S5 Table.** Sequence variants with a negative effect on the number of MII oocytes identified by statistical tests.

| <b>Gene</b>  | <b>Variant</b> | <b>Reference allele</b> | <b>Alternative allele</b> | <b>Mann–Whitney U statistic</b> | <b><i>p</i>-value</b> | <b>Kolmogorov–Smirnov statistic</b> | <b><i>p</i>-value</b> |
|--------------|----------------|-------------------------|---------------------------|---------------------------------|-----------------------|-------------------------------------|-----------------------|
| <i>AMH</i>   | rs8112524      | G                       | A                         | 39,418.50                       | 0.00                  | 0.17                                | 0.00                  |
| <i>AR</i>    | rs1337076      | T                       | G                         | 24,089.50                       | 0.00                  | 0.20                                | 0.00                  |
| <i>AR</i>    | rs150546551    | A                       | G                         | 6,156.50                        | 0.00                  | 0.30                                | 0.01                  |
| <i>AR</i>    | rs5919413      | T                       | C                         | 15,678.50                       | 0.00                  | 0.18                                | 0.02                  |
| <i>ESR1</i>  | rs4986934      | T                       | C                         | 51,220.50                       | 0.00                  | 0.12                                | 0.01                  |
| <i>ESR1</i>  | rs2228480      | G                       | A                         | 45,861.50                       | 0.00                  | 0.12                                | 0.02                  |
| <i>ESR1</i>  | rs2747648      | C                       | T                         | 36,921.50                       | 0.00                  | 0.15                                | 0.00                  |
| <i>ESR1</i>  | rs9341077      | T                       | C                         | 13,812.50                       | 0.02                  | 0.19                                | 0.03                  |
| <i>ESR1</i>  | rs2813543      | A                       | G                         | 40,263.50                       | 0.01                  | 0.11                                | 0.04                  |
| <i>ESR2</i>  | rs1255997      | T                       | C                         | 19,798.50                       | 0.00                  | 0.23                                | 0.00                  |
| <i>ESR2</i>  | rs8018687      | T                       | C                         | 14,554.00                       | 0.00                  | 0.25                                | 0.00                  |
| <i>ESR2</i>  | rs17225885     | T                       | G                         | 11,075.00                       | 0.00                  | 0.26                                | 0.00                  |
| <i>FSHB</i>  | rs78946483     | T                       | G                         | 11,601.50                       | 0.00                  | 0.20                                | 0.03                  |
| <i>FSHR</i>  | rs2072487      | C                       | T                         | 37,402.00                       | 0.00                  | 0.14                                | 0.00                  |
| <i>LHCGR</i> | rs6545063      | C                       | G                         | 24,976.50                       | 0.00                  | 0.23                                | 0.00                  |
| <i>PRLR</i>  | rs56251626     | C                       | G                         | 12,007.00                       | 0.00                  | 0.22                                | 0.01                  |
| <i>PRL</i>   | rs849884       | T                       | C                         | 35,635.00                       | 0.01                  | 0.14                                | 0.01                  |
| <i>FSHR</i>  | rs1394205      | C                       | T                         | 45,611.00                       | 0.00                  | 0.11                                | 0.02                  |
