# Supplementary material for: Personalized prediction of the secondary oocytes number after ovarian stimulation: A machine learning model based on clinical and genetic data
Source: PubMed Central journal article supplement (PMC10138216; doi:10.1371/journal.pcbi.1011020), 2023-04-27
Supplement: pcbi.1011020.s008.pdf [file pcbi.1011020.s008.pdf]

**S6 Table.** Ranking of sequence variants sorted by their importance in predicting the number of MII oocytes. Here, 1 denotes the most important variant for the prediction of the number of MII oocytes. The ranking was determined by the Boruta and Boruta-SHAP methods. SHAP—SHapley Additive exPlanations; AMH—anti-Müllerian hormone.

| Gene         | Final ranking | Variant    | Reference allele | Alternative allele | Boruta-SHAP ranking | Boruta with AMH ranking | Boruta without AMH ranking |
|--------------|---------------|------------|------------------|--------------------|---------------------|-------------------------|----------------------------|
| <i>GDF9</i>  | 1             | rs11739194 | T                | C                  | 2                   | 8                       | 3                          |
| <i>FSHB</i>  | 2             | rs676349   | A                | G                  | 4                   | 11                      | 6                          |
| <i>GDF9</i>  | 3             | rs17166294 | T                | C                  | 17                  | 35                      | 14                         |
| <i>ESR1</i>  | 4             | rs2273206  | G                | T                  | 38                  | 6                       | 29                         |
| <i>PRLR</i>  | 5             | rs56251626 | C                | G                  | 5                   | 64                      | 7                          |
| <i>ESR1</i>  | 6             | rs2207396  | G                | A                  | 20                  | 43                      | 17                         |
| <i>LHCGR</i> | 7             | rs11887058 | C                | T                  | 19                  | 44                      | 18                         |
| <i>PRL</i>   | 8             | rs7739889  | G                | A                  | 11                  | 64                      | 10                         |
| <i>PRLR</i>  | 9             | rs37364    | T                | G                  | 41                  | 16                      | 32                         |
| <i>FSHR</i>  | 10            | rs1394205  | C                | T                  | 14                  | 64                      | 12                         |
| <i>ESR2</i>  | 11            | rs928554   | C                | T                  | 21                  | 50                      | 19                         |
| <i>PRLR</i>  | 12            | rs73091143 | T                | A                  | 32                  | 33                      | 25                         |
| <i>ESR1</i>  | 13            | rs2273207  | A                | G                  | 25                  | 52                      | 20                         |
| <i>ESR1</i>  | 14            | rs2228480  | G                | A                  | 96                  | 1                       | 1                          |
| <i>FSHR</i>  | 15            | rs6165     | C                | T                  | 44                  | 22                      | 33                         |
| <i>LHCGR</i> | 16            | rs62137532 | C                | G                  | 24                  | 64                      | 21                         |
| <i>BMP15</i> | 17            | rs3810682  | C                | G                  | 30                  | 60                      | 24                         |
| <i>PRLR</i>  | 18            | rs112461   | A                | T                  | 29                  | 64                      | 23                         |
| <i>BMP15</i> | 19            | rs3897937  | A                | G                  | 37                  | 4                       | 84                         |
| <i>ESR1</i>  | 20            | rs2077647  | T                | C                  | 39                  | 7                       | 84                         |
