# Supplementary material for: Personalized prediction of the secondary oocytes number after ovarian stimulation: A machine learning model based on clinical and genetic data
Source: PubMed Central journal article supplement (PMC10138216; doi:10.1371/journal.pcbi.1011020), 2023-04-27
Supplement: pcbi.1011020.s009.pdf [file pcbi.1011020.s009.pdf]

**S7 Table.** Haplotypes with the greatest impact on the prediction of the number of MII oocytes. dbSNP Reference SNP number according to the National Center for Biotechnology Information (NCBI) dbSNP database (<https://www.ncbi.nlm.nih.gov/snp/>, accessed: 2022-04-05) is shown. Variants described compared to reference sequences listed in S2 Table and allele type is defined as Ref or Alt for variants corresponding to or differing from the reference sequence, respectively. Allele and haplotype frequencies are calculated for Group 2 consisting of 264 women.

| Haplotype      | Gene<br>(Chromosome)<br>Reference<br>sequence | dbSNP ID <sup>a</sup> | Sequence<br>variant | Allele/type <sup>b</sup> | Allele<br>frequency<br>(%) <sup>c</sup> | Haplotype<br>frequency <sup>c</sup> |
|----------------|-----------------------------------------------|-----------------------|---------------------|--------------------------|-----------------------------------------|-------------------------------------|
| Haplotype<br>1 | <i>FSHR</i> (chr2)<br>NC_000002.12            | NA                    | g.48755846=         | A/Ref                    | 1%                                      | 56%                                 |
|                |                                               | rs760106062           | g.48961885=         | C/Ref                    | <1%                                     |                                     |
|                |                                               | rs149343367           | g.48962033=         | C/Ref                    | <1%                                     |                                     |
|                |                                               | rs80111020            | g.48962060=         | A/Ref                    | 9%                                      |                                     |
|                |                                               | rs370297583           | g.48962210=         | C/Ref                    | <1%                                     |                                     |
|                |                                               | rs72825259            | g.48962487=         | A/Ref                    | 9%                                      |                                     |
|                |                                               | rs6166                | g.48962782C>T       | T/Alt                    | 71%                                     |                                     |
|                |                                               | rs757713421           | g.48963138=         | G/Ref                    | <1%                                     |                                     |
|                |                                               | rs202162496           | g.48963491=         | C/Ref                    | <1%                                     |                                     |
|                |                                               | rs1674333268          | g.48963599=         | C/Ref                    | <1%                                     |                                     |
|                |                                               | NA                    | g.48963670=         | A/Ref                    | <1%                                     |                                     |
|                |                                               | NA                    | g.48963773=         | G/Ref                    | <1%                                     |                                     |
|                |                                               | rs1444566790          | g.48963859=         | C/Ref                    | <1%                                     |                                     |
|                |                                               | NA                    | g.48968573=         | G/Ref                    | <1%                                     |                                     |
|                |                                               | rs377301289           | g.48968886=         | A/Ref                    | <1%                                     |                                     |
|                |                                               | NA                    | g.48982928=         | A/Ref                    | <1%                                     |                                     |
|                |                                               | rs75552966            | g.48982977=         | G/Ref                    | <1%                                     |                                     |
|                |                                               | NA                    | g.48988980=         | A/Ref                    | <1%                                     |                                     |
|                |                                               | rs111883853           | g.48989016=         | C/Ref                    | 2%                                      |                                     |
|                |                                               | rs182717950           | g.48989135=         | A/Ref                    | <1%                                     |                                     |
| rs779456539    | g.48990555=                                   | A/Ref                 | 1%                  |                          |                                         |                                     |
| rs754335673    | g.48990619=                                   | A/Ref                 | <1%                 |                          |                                         |                                     |
| Haplotype<br>2 | <i>PRLR</i> (chr5)<br>NC_000005.10            | rs173627              | g.35060399=         | C/Ref                    | 1%                                      | 55%                                 |
|                |                                               | rs249521              | g.35060411=         | A/Ref                    | 1%                                      |                                     |
|                |                                               | rs392279              | g.35060629=         | T/Ref                    | 1%                                      |                                     |
|                |                                               | NA                    | g.35060923=         | C/Ref                    | <1%                                     |                                     |
|                |                                               | rs918370607           | g.35061009=         | A/Ref                    | <1%                                     |                                     |
|                |                                               | rs576920157           | g.35061154=         | G/Ref                    | <1%                                     |                                     |
|                |                                               | rs387032              | g.35061629=         | T/Ref                    | 16%                                     |                                     |
|                |                                               | rs916915584           | g.35061761=         | T/Ref                    | <1%                                     |                                     |
|                |                                               | rs147879910           | g.35061871=         | A/Ref                    | <1%                                     |                                     |
|                |                                               | NA                    | g.35061973=         | C/Ref                    | <1%                                     |                                     |
|                |                                               | NA                    | g.35062253=         | A/Ref                    | <1%                                     |                                     |
|                |                                               | rs401694              | g.35062516=         | C/Ref                    | 23%                                     |                                     |
|                |                                               | NA                    | g.35062627=         | A/Ref                    | <1%                                     |                                     |
|                |                                               | NA                    | g.35063008=         | G/Ref                    | <1%                                     |                                     |
|                |                                               | rs1010119             | g.35063015=         | T/Ref                    | 9%                                      |                                     |
|                |                                               | rs531094388           | g.35063098=         | T/Ref                    | <1%                                     |                                     |
|                |                                               | rs112461              | g.35063190=         | A/Ref                    | 24%                                     |                                     |
|                |                                               | rs569332036           | g.35063323=         | G/Ref                    | <1%                                     |                                     |
|                |                                               | rs185993146           | g.35064072=         | A/Ref                    | <1%                                     |                                     |

|                |                                    |              |                |       |     |     |
|----------------|------------------------------------|--------------|----------------|-------|-----|-----|
|                |                                    | NA           | g.35064118=    | C/Ref | <1% |     |
|                |                                    | rs73091133   | g.35064133=    | A/Ref | 9%  |     |
|                |                                    | rs1057829    | g.35064358=    | G/Ref | 6%  |     |
|                |                                    | rs1057828    | g.35064413=    | C/Ref | 6%  |     |
|                |                                    | rs73091139   | g.35064637=    | C/Ref | 7%  |     |
|                |                                    | rs540951852  | g.35064682=    | A/Ref | <1% |     |
|                |                                    | rs56251626   | g.35064922=    | C/Ref | 7%  |     |
|                |                                    | rs904632267  | g.35065026=    | G/Ref | <1% |     |
|                |                                    | rs931915988  | g.35065030=    | T/Ref | 1%  |     |
|                |                                    | rs764216661  | g.35065384=    | G/Ref | <1% |     |
|                |                                    | rs56255573   | g.35065529=    | T/Ref | <1% |     |
|                |                                    | rs62355478   | g.35065548=    | C/Ref | 1%  |     |
|                |                                    | NA           | g.35065924=    | G/Ref | <1% |     |
|                |                                    | rs1176242279 | g.35065955=    | T/Ref | <1% |     |
|                |                                    | rs79469561   | g.35068136=    | C/Ref | 9%  |     |
|                |                                    | rs78373811   | g.35068146=    | G/Ref | 9%  |     |
|                |                                    | rs754974807  | g.35068265=    | G/Ref | <1% |     |
|                |                                    | rs78921428   | g.35068741=    | T/Ref | <1% |     |
|                |                                    | rs186609463  | g.35069864=    | G/Ref | 2%  |     |
|                |                                    | rs72734529   | g.35069940=    | G/Ref | 1%  |     |
|                |                                    | rs73091143   | g.35069955=    | T/Ref | 1%  |     |
|                |                                    | NA           | g.35070101C>A  | A/Alt | <1% |     |
| Haplotype<br>3 | <i>GDF9</i> (chr5)<br>NC_000005.10 | NA           | g.132865408=   | A/Ref | <1% | 36% |
|                |                                    | rs17166283   | g.132865453=   | G/Ref | <1% |     |
|                |                                    | rs17166287   | g.132865691=   | T/Ref | <1% |     |
|                |                                    | rs76546692   | g.132866060=   | G/Ref | <1% |     |
|                |                                    | rs75061517   | g.132866082=   | T/Ref | 31% |     |
|                |                                    | rs17166294   | g.132866205=   | T/Ref | 29% |     |
|                |                                    | rs565694855  | g.132866215=   | C/Ref | <1% |     |
|                |                                    | rs140063257  | g.132866313=   | T/Ref | <1% |     |
|                |                                    | rs1475178166 | g.132866484=   | G/Ref | <1% |     |
|                |                                    | NA           | g.132866553=   | G/Ref | <1% |     |
|                |                                    | NA           | g.132866657=   | A/Ref | <1% |     |
|                |                                    | rs30178      | g.132866707T>C | C/Alt | 92% |     |
|                |                                    | rs30177      | g.132866719C>G | G/Alt | 92% |     |
|                |                                    | rs181795818  | g.132866743=   | G/Ref | <1% |     |
|                |                                    | NA           | g.132866746=   | C/Ref | <1% |     |
|                |                                    | NA           | g.132867052=   | C/Ref | 7%  |     |

*a*— dbSNP Reference SNP number according to the National Center for Biotechnology Information (NCBI) dbSNP database (<https://www.ncbi.nlm.nih.gov/snp/>, accessed: 2022-04-05);

*b*—allele type is defined as Ref for reference sequence variants and Alt for alternative sequence variants;

*c*—allele and haplotype frequencies were calculated for Group 2 consisting of 264 women.
