# Supplementary material for: Personalized prediction of the secondary oocytes number after ovarian stimulation: A machine learning model based on clinical and genetic data
Source: PubMed Central journal article supplement (PMC10138216; doi:10.1371/journal.pcbi.1011020), 2023-04-27
Supplement: pcbi.1011020.s014.pdf [file pcbi.1011020.s014.pdf]

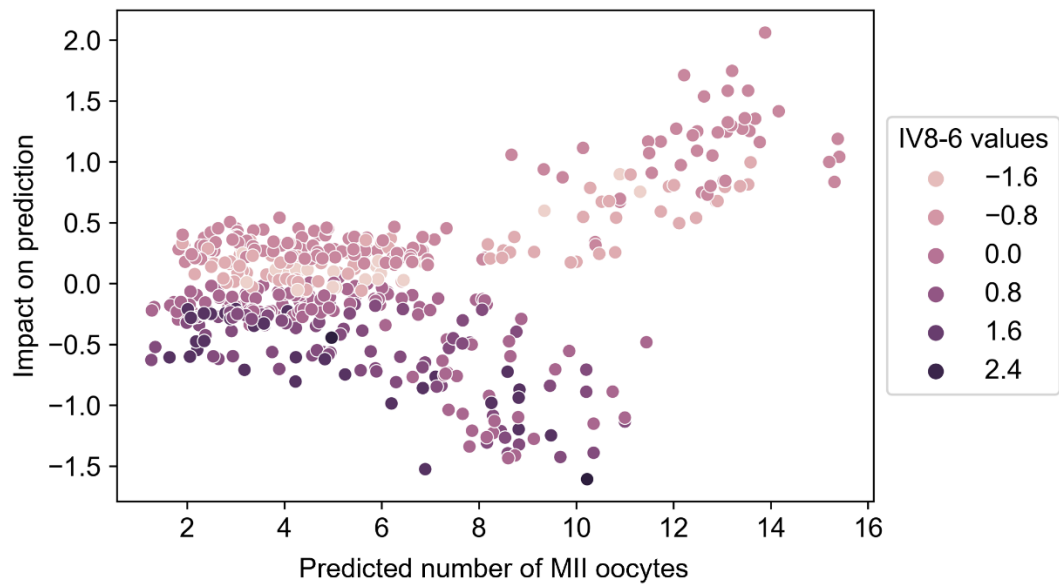

**S4 Fig. Effect of variants in IV8-6 feature on MII oocyte predictions with regards to anti-Müllerian hormone (AMH) level.** Range  $[-1.6, 2.4]$  represents the standardized number of alternative alleles in six variants comprising the genetic feature IV8-6 revealed by SOM analysis.
